# Supplementary material for: The use of electronic alerts in primary care computer systems to identify the excessive prescription of short-acting beta2-agonists for people with asthma: a systematic review
Source: PubMed Central journal article supplement (PMC5902442; doi:10.1038/s41533-018-0080-z), 2018-04-16
Supplement: 41533_2018_80_MOESM1_ESM.pdf [file 41533_2018_80_MOESM1_ESM.pdf]

**SUPPLEMENTARY TABLE**

Detailed description of intervention features of included studies; adapted from Kawamoto *et al.*'s.<sup>21</sup> framework for reporting CDSSs and Berlin *et al.*'s.<sup>42</sup> computer decision support system taxonomy

| Features of CDSSs                              | McCowan <i>et al.</i> <sup>28</sup> | Eccles <i>et al.</i> <sup>29</sup> | Zeiger <i>et al.</i> <sup>30</sup>                                            | Tamblyn <i>et al.</i> <sup>31</sup>       |
|------------------------------------------------|-------------------------------------|------------------------------------|-------------------------------------------------------------------------------|-------------------------------------------|
| <b>Context</b>                                 |                                     |                                    |                                                                               |                                           |
| <b>Clinical setting</b>                        | Primary Care (NHS)                  | Primary care (NHS)                 | Primary Care (Kaiser Permanente Managed Care Organisation)                    | Primary Care (Insured Health care system) |
| <b>Clinical task</b>                           | Asthma management                   | Asthma management                  | SABA use                                                                      | Asthma management                         |
| <b>Unit of optimization</b>                    | Process and patient outcomes        | Process and patient outcomes       | Process and patient outcomes                                                  | Process and patient outcomes              |
| <b>Relation to point of care</b>               | In-consultation                     | In-consultation                    | Non-specific                                                                  | In-consultation                           |
| <b>External behavior modification programs</b> | Not reported                        | Not reported                       | Not reported                                                                  | Not reported                              |
| <b>Potential barriers</b>                      | Double data entry required          | Method of intervention trigger     | None identified                                                               | Non-asthma specific consultation          |
| <b>Knowledge and data source</b>               |                                     |                                    |                                                                               |                                           |
| <b>Clinical knowledge source</b>               | British Asthma Guidelines           | Study developed guidelines         | National Asthma Education & Prevention Programme/Global Initiative for Asthma | Canadian consensus guidelines             |
| <b>Data source</b>                             | Manually entered                    | Electronic health record           | Research data warehouse                                                       | Electronic health record                  |
| <b>Data coding</b>                             | Not reported                        | Not reported                       | Not reported                                                                  | Not reported                              |
| <b>Degree of customisation</b>                 | Generic                             | Generic                            | Personalised                                                                  | Personalised                              |
| <b>Update mechanism</b>                        | Not reported                        | Not reported                       | Not reported                                                                  | Not reported                              |

| Decision Support                   | McCowan <i>et al.</i> <sup>28</sup>                                                                                                                                             | Eccles <i>et al.</i> <sup>29</sup>                                                                                                                                    | Zeiger <i>et al.</i> <sup>30</sup>                                                                                                                                                 | Tamblyn <i>et al.</i> <sup>31</sup>                                                                                                                                                                                                                                                                                                          |
|------------------------------------|---------------------------------------------------------------------------------------------------------------------------------------------------------------------------------|-----------------------------------------------------------------------------------------------------------------------------------------------------------------------|------------------------------------------------------------------------------------------------------------------------------------------------------------------------------------|----------------------------------------------------------------------------------------------------------------------------------------------------------------------------------------------------------------------------------------------------------------------------------------------------------------------------------------------|
| <b>Type of system</b>              | <i>Asthma Crystal Byte</i><br>Computer decision support based on asthma guidelines, clinical scenarios and reminders.                                                           | <i>Computer decision support system (CDSS)</i><br>Asthma management and prescribing suggestions based on guidelines, clinical scenarios and health record information | <i>Real-time outreach</i><br>Real-time identification, notification, and facilitated allergy specialist referral for excessive SABA users.                                         | <i>Asthma Decision Support (ADS)</i><br>A dashboard alert, decision support for evidence-based asthma management and asthma home care and monitoring programme.                                                                                                                                                                              |
| <b>Reasoning method</b>            | Not reported                                                                                                                                                                    | Not reported                                                                                                                                                          | Not reported                                                                                                                                                                       | Not reported                                                                                                                                                                                                                                                                                                                                 |
| <b>Alert activation</b>            | Specific presentation complaints or features would trigger a series of prompts based on a previously determined protocol, which would have included a warning for SABA overuse. | Contextualised prompts including management suggestions were triggered when an asthma morbidity code was entered.                                                     | An electronic message within the electronic medical record system was sent to a patient's primary care provider, once-only, when a patient with excessive SABA use was identified. | Alert automatically activates upon opening the medical record of a patient with out-of-control asthma. Out-of-control asthma defined as having had an ER visit or a hospitalisation for respiratory-related problems in the past 3 months and/or the excess use (>250 doses dispensed) of fast-acting b-agonist (FABA) in the past 3 months. |
| <b>Clinical urgency</b>            | Not reported                                                                                                                                                                    | Not reported                                                                                                                                                          | Not reported                                                                                                                                                                       | Not reported                                                                                                                                                                                                                                                                                                                                 |
| <b>Recommendation explicitness</b> | Explicit                                                                                                                                                                        | Explicit                                                                                                                                                              | Explicit                                                                                                                                                                           | Explicit                                                                                                                                                                                                                                                                                                                                     |
| <b>Logistical complexity</b>       | Simple                                                                                                                                                                          | Simple                                                                                                                                                                | Simple                                                                                                                                                                             | Simple                                                                                                                                                                                                                                                                                                                                       |
| <b>Response requirement</b>        | None                                                                                                                                                                            | None                                                                                                                                                                  | None                                                                                                                                                                               | None                                                                                                                                                                                                                                                                                                                                         |

| Information delivery                                        | McCowan <i>et al.</i> <sup>28</sup>                                                                                                                                                                           | Eccles <i>et al.</i> <sup>29</sup>                                                                                                                                                                                    | Zeiger <i>et al.</i> <sup>30</sup>                                                                                                                                                                                                                                                                                                 | Tamblyn <i>et al.</i> <sup>31</sup>                                                                                                                                                                                                                                                     |
|-------------------------------------------------------------|---------------------------------------------------------------------------------------------------------------------------------------------------------------------------------------------------------------|-----------------------------------------------------------------------------------------------------------------------------------------------------------------------------------------------------------------------|------------------------------------------------------------------------------------------------------------------------------------------------------------------------------------------------------------------------------------------------------------------------------------------------------------------------------------|-----------------------------------------------------------------------------------------------------------------------------------------------------------------------------------------------------------------------------------------------------------------------------------------|
| <b>Delivery format</b>                                      | Electronic                                                                                                                                                                                                    | Electronic                                                                                                                                                                                                            | Electronic                                                                                                                                                                                                                                                                                                                         | Electronic                                                                                                                                                                                                                                                                              |
| <b>Delivery mode</b>                                        | Voluntary                                                                                                                                                                                                     | Voluntary                                                                                                                                                                                                             | Voluntary                                                                                                                                                                                                                                                                                                                          | Voluntary                                                                                                                                                                                                                                                                               |
| <b>Integration</b>                                          | No-the programme was delivered on a 3 ½ inch floppy disk to be installed on participants Microsoft Windows compatible computer desktop to be used for asthma consultations.                                   | No-the CDSS was a programme accessible from within the main computerised operating system of the two suppliers. The guideline was a separate pathway within the clinical system.                                      | Yes-the asthma out-reach used the standard Kaiser Permanente Southern California (KPSC) electronic medical record system and electronic registry that allows physicians access to dispensing data and hospital data in a managed care organisation (MCO).                                                                          | Yes-the ADS can be accessed from a tab in the electronic health record for intervention physicians or from the dashboard alert, when it appears.                                                                                                                                        |
| <b>Explanation availability</b>                             | The research team constructed non-judgemental feedback and management suggestions based on British Asthma Guidelines but it is not clear if the rationale behind recommendations was presented to physicians. | It was unclear whether clinicians were informed of the guideline evidence when recommendations were presented or whether the recommendations prompted the clinician to access the separate pathway for the guideline. | Physicians- 'Kaiser Permanente and other groups have documented this amount of albuterol is a sign of uncontrolled asthma...'<br>Patients- 'Kaiser Permanente and other groups have shown that care by allergists helps to improve asthma control'; 'too much use of [reliever] may indicate your asthma control could be better.' | Dashboard alert: 'since the last time you accessed the record, new information is available.'<br>Decision support for evidence-based asthma management: provides physicians with access to Canadian asthma guidelines, including translation into assessment tools and recommendations. |
| <b>Provision of a recommendation not just an assessment</b> | Prompts included e.g. 'check inhaler technique,' 'review compliance,' 'consider increasing dose of preventer inhaler.'                                                                                        | The system offered suggestions for management including prescribing.                                                                                                                                                  | Included recommendations for treatment e.g. commence preventer medication, physician contact and allergy referral.                                                                                                                                                                                                                 | Patient specific recommendations generated.                                                                                                                                                                                                                                             |

| Information delivery                                                         | McCowan <i>et al.</i> <sup>28</sup>                                  | Eccles <i>et al.</i> <sup>29</sup>                                                                                             | Zeiger <i>et al.</i> <sup>30</sup>                                                                                                                             | Tamblyn <i>et al.</i> <sup>31</sup>                                                                                                                                                                                                                                                                             |
|------------------------------------------------------------------------------|----------------------------------------------------------------------|--------------------------------------------------------------------------------------------------------------------------------|----------------------------------------------------------------------------------------------------------------------------------------------------------------|-----------------------------------------------------------------------------------------------------------------------------------------------------------------------------------------------------------------------------------------------------------------------------------------------------------------|
| <b>Recommendations executed by noting agreement i.e. click 'OK'</b>          | Not reported                                                         | Not reported                                                                                                                   | Not applicable                                                                                                                                                 | <p>Dashboard alert- 'Click here to enrol your patient in the Asthma Assist Program immediately'; 'update suggested treatment'; 'proceed with changes.'</p> <p>Decision support- patient specific recommendations generated and once selected, prescriptions and action plans where automatically generated.</p> |
| <b>Request documentation of reasons if CDSS recommendations not followed</b> | Not reported                                                         | Not reported                                                                                                                   | Electronic message was sent to physicians informing of the patient's uncontrolled asthma status but did provide recommendations for the physician to act upon. | The dashboard alert could be exited however no further information was reported.                                                                                                                                                                                                                                |
| <b>Interactive delivery</b>                                                  | Yes                                                                  | Yes                                                                                                                            | Not applicable                                                                                                                                                 | Yes                                                                                                                                                                                                                                                                                                             |
| <b>Additional clinical data entry not required</b>                           | No- the system used data entered on a specialised data entry screen. | Yes-the system anticipated clinicians' requirements by using the information contained within a patient's computerised record. | Yes-patients were identified using computer algorithm data collected in the KPSC research data warehouse. No clinician input was necessary.                    | Yes-patient's asthma control was determined dynamically, based on a daily retrieval of newly dispensed prescriptions and physician visit information from the provincial health insurance databases at the Regie de l'assurance maladie Quebec (RAMQ).                                                          |

| <b>Workflow</b>                                                       | <b>McCowan <i>et al.</i><sup>28</sup></b>                                                                                                                                         | <b>Eccles <i>et al.</i><sup>29</sup></b>                                                                       | <b>Zeiger <i>et al.</i><sup>30</sup></b>                               | <b>Tamblyn <i>et al.</i><sup>31</sup></b>                                            |
|-----------------------------------------------------------------------|-----------------------------------------------------------------------------------------------------------------------------------------------------------------------------------|----------------------------------------------------------------------------------------------------------------|------------------------------------------------------------------------|--------------------------------------------------------------------------------------|
| <b>System user</b>                                                    | General practitioner                                                                                                                                                              | Doctor or nurse                                                                                                | Physician                                                              | Physician                                                                            |
| <b>Target decision maker</b>                                          | General practitioner                                                                                                                                                              | Doctor or nurse                                                                                                | Physician and patient                                                  | Physician                                                                            |
| <b>Data input intermediary</b>                                        | General practitioner                                                                                                                                                              | Doctor or nurse                                                                                                | Not required                                                           | Not required                                                                         |
| <b>Output intermediary</b>                                            | Not required                                                                                                                                                                      | Not required                                                                                                   | Not required                                                           | Not required                                                                         |
| <b>Workflow integration</b>                                           | Intervention software ran alongside practice software                                                                                                                             | To access guidelines the clinical system had to be exited                                                      | Generated within KPSC electronic medical record system                 | Integrated with clinician workflow                                                   |
| <b>Auxiliary features</b>                                             |                                                                                                                                                                                   |                                                                                                                |                                                                        |                                                                                      |
| <b>Local user involvement in development process</b>                  | The Asthma Crystal Byte software was designed and developed by a project team, reviewed over an 18 month period by a steering group; 'The General Practitioners in Asthma Group.' | Not reported                                                                                                   | Not reported                                                           | Not reported                                                                         |
| <b>Provision of decision support to patients as well as providers</b> | Customised self-management plans and patient advice sheets                                                                                                                        | Not reported                                                                                                   | Physicians were contacted by electronic message and patients by letter | Asthma action plans were automatically generated when recommendation accepted        |
| <b>CDSS accompanied by periodic performance feedback</b>              | Not reported                                                                                                                                                                      | Feedback regarding the intervention was obtained from practices at 4 months, however not clinician performance | Not reported                                                           | Not reported                                                                         |
| <b>CDSS accompanied by education/training</b>                         | 'On-line help was incorporated into the software and an installation booklet and user guide were also provided.'                                                                  | Two members from each intervention practice were sent to a one-day workshop on how to use the system           | Not reported                                                           | Not reported                                                                         |
| <b>Funding</b>                                                        | Not reported                                                                                                                                                                      | £900,000 from NHS, EMIS and the Department of Health                                                           | Genentech Inc.                                                         | Institutes of Health Research and Health Infostructure Partnership Program of Health |
