# Supplementary material for: The use of electronic alerts in primary care computer systems to identify the excessive prescription of short-acting beta2-agonists for people with asthma: a systematic review
Source: PubMed Central journal article supplement (PMC5902442; doi:10.1038/s41533-018-0080-z), 2018-04-16
Supplement: 41533_2018_80_MOESM2_ESM.pdf [file 41533_2018_80_MOESM2_ESM.pdf]

## SUPPLEMENTARY METHODS: Search Strategies

### Medline

- 1 exp Asthma/
- 2 asthma\*.mp.
- 3 (antiasthma\* or anti-asthma\*).mp.
- 4 Respiratory Sounds/
- 5 wheez\*.mp.
- 6 Bronchial Spasm/
- 7 bronchospas\*.mp.
- 8 (bronc\* adj3 spasm\*).mp.
- 9 bronchoconstrict\*.mp.
- 10 exp Bronchoconstriction/
- 11 (bronch\* adj3 constrict\*).mp.
- 12 Bronchial Hyperreactivity/
- 13 Respiratory Hypersensitivity/
- 14 ((bronchial\* or respiratory or airway\* or lung\*) adj3 (hypersensitiv\* or hyperreactiv\* or allerg\* or insufficiency)).mp.
- 15 ((dust or mite\*) adj3 (allerg\* or hypersensitiv\*)).mp.
- 16 1 or 2 or 3 or 4 or 5 or 6 or 7 or 8 or 9 or 10 or 11 or 12 or 13 or 14 or 15
- 17 exp DECISION SUPPORT SYSTEMS, CLINICAL/
- 18 exp DECISION SUPPORT SYSTEMS, MANAGEMENT/
- 19 exp DECISION SUPPORT TECHNIQUES/
- 20 exp DECISION MAKING, COMPUTER-ASSISTED/
- 21 exp MEDICAL RECORDS SYSTEMS, COMPUTERIZED/
- 22 "decision support".ti,ab
- 23 "expert system\$".ti,ab
- 24 cdss.ti,ab
- 25 17 or 18 or 19 or 20 or 21 or 22 or 23 or 24
- 26 exp Clinical Trial/
- 27 (randomized or randomised).ab,ti.
- 28 placebo.ab,ti.
- 29 dt.fs.
- 30 randomly.ab,ti.
- 31 trial.ab,ti.

- 32 groups.ab,ti.
- 33 Or/26-32
- 34 Animals/
- 35 Humans/
- 36 34 not (34 and 35)
- 37 33 not 36
- 38 16 and 25 and 37
- 39 Limit 38 to yr="1990 – 2-16"

### **Embase**

- 1 exp Asthma/
- 2 asthma\*.mp.
- 3 (antiasthma\* or anti-asthma\*).mp.
- 4 Respiratory Sounds/
- 5 wheez\*.mp.
- 6 Bronchial Spasm/
- 7 bronchospas\*.mp.
- 8 (bronc\* adj3 spasm\*).mp.
- 9 bronchoconstrict\*.mp.
- 10 exp Bronchoconstriction/
- 11 (bronch\* adj3 constrict\*).mp.
- 12 Bronchial Hyperreactivity/
- 13 Respiratory Hypersensitivity/
- 14 ((bronchial\* or respiratory or airway\* or lung\*) adj3 (hypersensitiv\* or hyperreactiv\* or allerg\* or insufficiency)).mp.
- 15 ((dust or mite\*) adj3 (allerg\* or hypersensitiv\*)).mp.
- 16 1 or 2 or 3 or 4 or 5 or 6 or 7 or 8 or 9 or 10 or 11 or 12 or 13 or 14 or 15
- 17 exp DECISION SUPPORT SYSTEMS, CLINICAL/
- 18 exp DECISION SUPPORT SYSTEMS, MANAGEMENT/
- 19 exp DECISION SUPPORT TECHNIQUES/
- 20 exp DECISION MAKING, COMPUTER-ASSISTED/
- 21 exp MEDICAL RECORDS SYSTEMS, COMPUTERIZED/

22 "decision support".ti,ab  
23 "expert system\$" .ti,ab  
24 cdss.ti,ab  
25 17 or 18 or 19 or 20 or 21 or 22 or 23 or 24  
26 Randomized Controlled Trial/  
27 Randomization/  
28 Controlled Study  
29 Clinical Trial/  
30 controlled clinical trial/  
31 Double Blind Procedure/  
32 Single Blind Procedure/  
33 Crossover Procedure/  
34 or/26-33  
35 (clinica\$ adj3 trial\$).mp.  
36 ((singl\$ or doubl\$ or trebl\$ or tripl\$) adj3 (mask\$ or blind\$ or method\$)).mp.  
37 exp Placebo/  
38 Placebo\$.mp.  
39 random\$.mp.  
40 ((control\$ or prospective\$) adj3 (trial\$ or method\$ or stud\$)).mp.  
41 (crossover\$ or cross-over\$).mp.  
42 or/35-41  
43 34 or 42  
44 Exp ANIMAL/  
45 Nonhuman/  
46 Human/  
47 44 or 45  
48 47 not 46  
49 43 not 48  
50 16 and 25 and 49  
51 Limit 50 to yr="1990 – 2016"

## Cochrane Central Trials Register

- #1 MeSH descriptor Asthma explode all trees
- #2 (asthma\*)
- #3 (antiasthma\* or anti-asthma\*)
- #4 MeSH descriptor Respiratory Sounds, this term only
- #5 (wheez\*)
- #6 MeSH descriptor Bronchial Spasm, this term only
- #7 (bronchospas\*)
- #8 (bronch\* near/3 spasm\*)
- #9 (bronchoconstrict\*)
- #10 MeSH descriptor Bronchoconstriction explode all trees
- #11 (bronch\* near/3 constrict\*)
- #12 MeSH descriptor Bronchial Hyperreactivity, this term only
- #13 MeSH descriptor Respiratory Hypersensitivity, this term only
- #14 (bronchial\* or respiratory or airway\* or lung\*) near/3 (hypersensitiv\* or hyperreactiv\* or allerg\* or insufficien\*)
- #15 (dust or mite\*) near/3 (allerg\* or hypersensitiv\*)
- #16 (#1 OR #2 OR #3 OR #4 OR #5 OR #6 OR #7 OR #8 OR #9 OR #10 OR #11 OR #12 OR #13 OR #14 OR #15)
- #17 MeSH descriptor: [DECISION SUPPORT SYSTEMS, CLINICAL] explode all trees
- #18 MeSH descriptor: [DECISION SUPPORT SYSTEMS, MANAGEMENT] explode all trees
- #19 MeSH descriptor: [DECISION SUPPORT TECHNIQUES] explode all trees
- #20 MeSH descriptor: [Decision Making, Computer-Assisted] explode all trees
- #21 MeSH descriptor: [Medical Records Systems, Computerized] explode all trees
- #22 "decision support"
- #23 "expert system\$"
- #24 cdss
- #25 #17 or #18 or #19 or #20 or #21 or #22 or #23 or #24
- #26 Randomized Controlled Trial
- #27 randomization

- #28 Controlled Study
- #29 Clinical Trial
- #30 Controlled clinical trial
- #31 Double Blind Procedure
- #32 Single Blind Procedure
- #33 Crossover Procedure
- #34 (#26 or #27 or #28 or #29 or #30 or #31 or #32 or #33)
- #35 clinica\* near/3 trial\*
- #36 (singl\* or doubl\* or trebl\* or tripl\*) near/3 (mask\* or blind\* or method\*)
- #37 placebo\*
- #38 random\*
- #39 (control\* or prospective\*) near/3 (trial\* or method\* or stud\*)
- #40 (crossover\* or cross-over\*)
- #41 (#35 or #36 or #37 or #38 or #39 or #40)
- #42 (#34 or #41)
- #43 ANIMAL
- #44 Nonhuman
- #45 Human
- #46 (#43 or #44)
- #47 (#46 and not #45)
- #48 (#42 and not #47)
- #49 (#16 and #25 and #48)

**CINAHL**

- S1 (MH "Asthma)
- S2 asthma\*
- S3 antiasthma\* or anti-asthma\*
- S4 (MH "Respiratory Sounds+")
- S5 wheez\*

S6 bronchospas\*

S7 bronch\* N3 spasm\*

S8 bronchoconstrict\*

S9 bronch\* N3 constrict\*

S10 (MH "Respiratory Hypersensitivity+")

S11 "house dust mites"

S12 S1 or S2 or S3 or S4 or S5 or S6 or S7 or S8 or S9 or S10 or S11

S13 decision support systems, management

S14 decision support systems, clinical

S15 decision support techniques

S16 decision making, computer assisted

S17 computerized patient record

S18 patient record systems

S19 clinical information systems

S20 decision support

S21 expert systems

S22 cdss

S23 S13 or S14 or S15 or S16 or S17 or S18 or S19 or S20 or S21 or S22

S24 (MH "Clinical Trials")

S25 random\*

S26 placebo\*

S27 clinical\* N3 (trial\* or study or studies)

S28 (single\* or double\* or triple\*) N3 blind\*

S29 crossover or cross-over\*  
S30 S24 or S25 or S26 or S27 or S28 or S29  
S31 S12 AND S23 AND S30

## **SCOPUS**

All (asthma) AND  
All (“clinical decision support”) OR  
All (“decision support techniques”) OR  
All (“computer assisted decision making”) OR  
All (“computerised medical record system”) OR  
All (“decision support”) OR  
All (“expert system”) OR  
All (cdss) AND  
All (“randomized controlled trial”) OR  
All (randomization) OR  
All (“controlled study”) OR  
All (“RCT”) OR  
All (trial\*) OR  
All (“clinical trial”) OR  
All (“controlled clinical trial”) AND  
DOCTYPE (ar) AND  
PUBYEAR >1989 AND  
PUBYEAR < 2017
